# Supplementary material for: Single particle ICP-MS combined with internal standardization for accurate characterization of polydisperse nanoparticles in complex matrices
Source: Royal Society of Chemistry journal article supplement (doi:10.1039/d0ja00180e), 2020-01-01
Supplement: d0ja00180e1.pdf [file d0ja00180e1.pdf]

## **Single particle ICP-MS combined with internal standardization for accurate characterization of polydisperse nanoparticles in complex matrices**

Yingyan Huang,<sup>a</sup> Judy Tsz-Shan Lum,<sup>a</sup> Kelvin Sze-Yin Leung<sup>\*a,b</sup>

<sup>a</sup> Department of Chemistry, Hong Kong Baptist University, Kowloon Tong, Hong Kong  
Special Administrative Region

<sup>b</sup> HKBU Institute of Research and Continuing Education, Shenzhen Virtual University Park,  
Shenzhen, China

### Keywords

Single particle inductively coupled plasma-mass spectrometry; cerium dioxide nanoparticles; matrix effect; internal standardization; polydisperse nanoparticles

### **Figures in Electronic Supplementary Information:**

**Fig. S1.** Time-resolved signal of  $^{140}\text{Ce}$  of  $1 \mu\text{g L}^{-1}$  ionic Ce in 2% nitric acid, 500-time diluted enzyme-digested matrix, urine and plasma.

**Fig. S2.** Time-resolved signal of  $^{103}\text{Rh}$  of  $1 \mu\text{g L}^{-1}$  Rh in 2% nitric acid, 500-time diluted enzyme-digested matrix, urine and plasma.

**Fig. S3.** Information of  $\text{CeO}_2$  NPs determined by sp-ICP-MS after the IS correction at a dilution factor of 500: a) comparison on mass concentration determined by sp-ICP-MS and conventional ICP-MS (paired t-test,  $p < 0.05$ ); b) particle number concentration of  $\text{CeO}_2$  NPs.

**Fig.S4.** Information of  $\text{CeO}_2$  NPs determined by sp-ICP-MS without the IS correction at a dilution factor of 2,500: a) a comparison on mass concentration determined by sp-ICP-MS and conventional ICP-MS. \* Indicates a significant difference between the two methods through a paired t-test ( $p < 0.05$ ); b) particle number concentration of  $\text{CeO}_2$  NPs.

**Fig. S5.** Information of  $\text{CeO}_2$  NPs determined by sp-ICP-MS with the IS correction at a dilution factor of 2,500: a) a comparison on mass concentration determined by sp-ICP-MS and conventional ICP-MS (paired t-test,  $p < 0.05$ ); b) particle number concentration of  $\text{CeO}_2$  NPs.

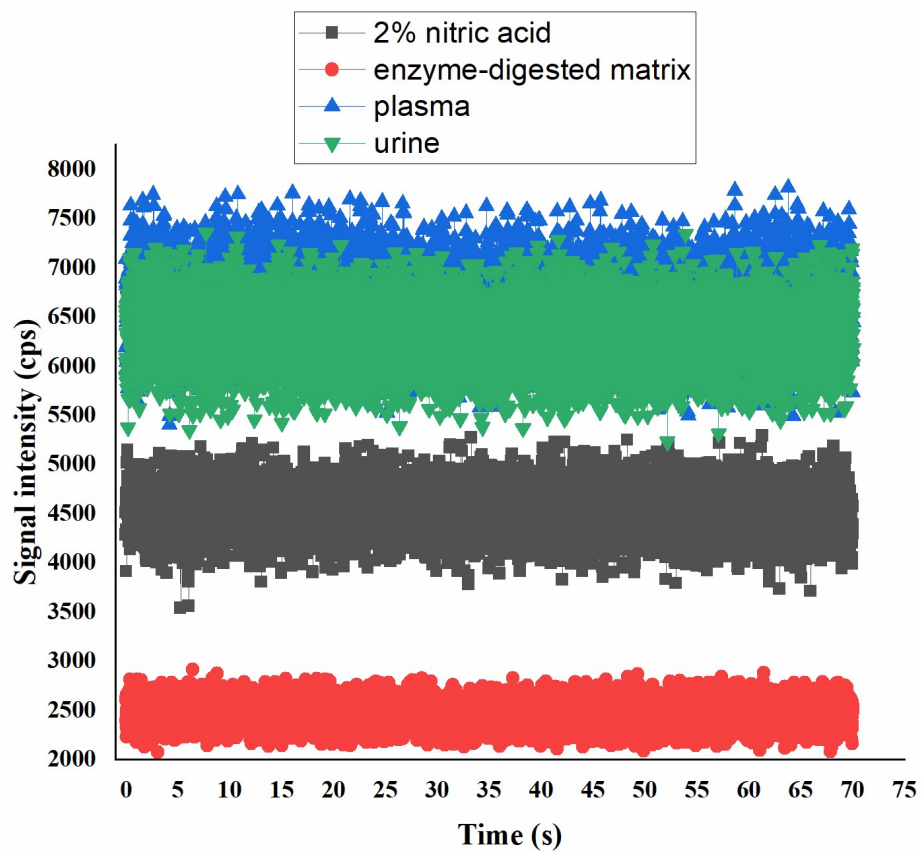

**Fig. S1.** Time-resolved signal of  $^{140}\text{Ce}$  of  $1 \mu\text{g L}^{-1}$  ionic Ce in 2% nitric acid, 500-time diluted enzyme-digested matrix, urine and plasma.

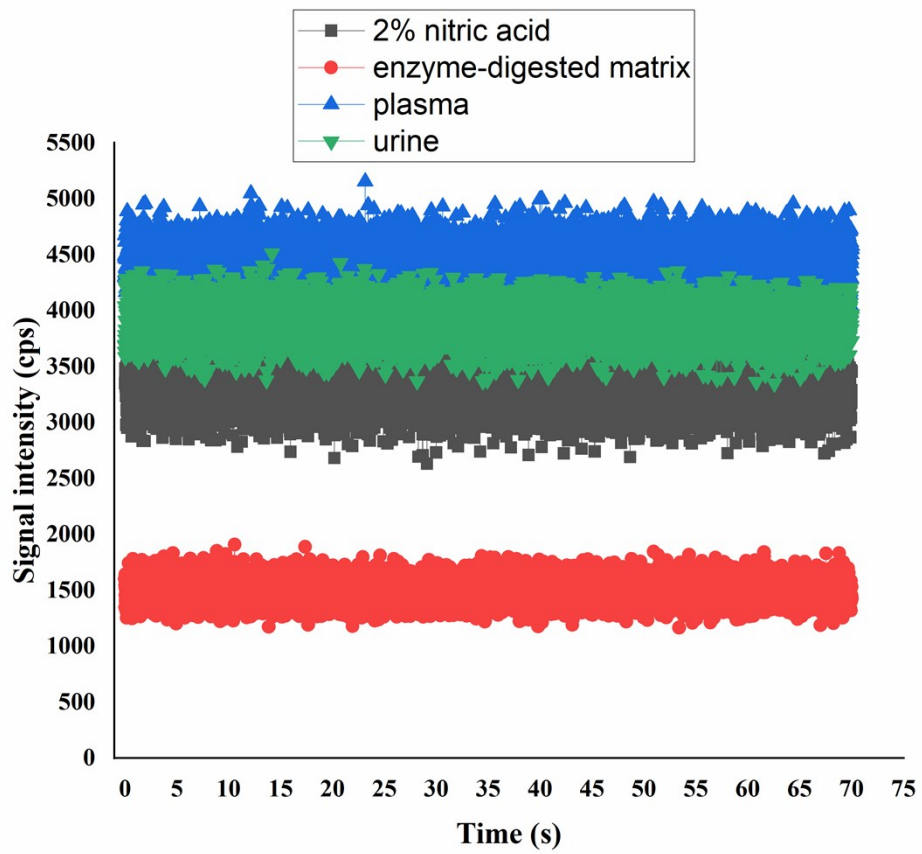

**Fig. S2.** Time-resolved signal of  $^{103}\text{Rh}$  of  $1 \mu\text{g L}^{-1}$  Rh in 2% nitric acid, 500-time diluted enzyme-digested matrix, urine and plasma.

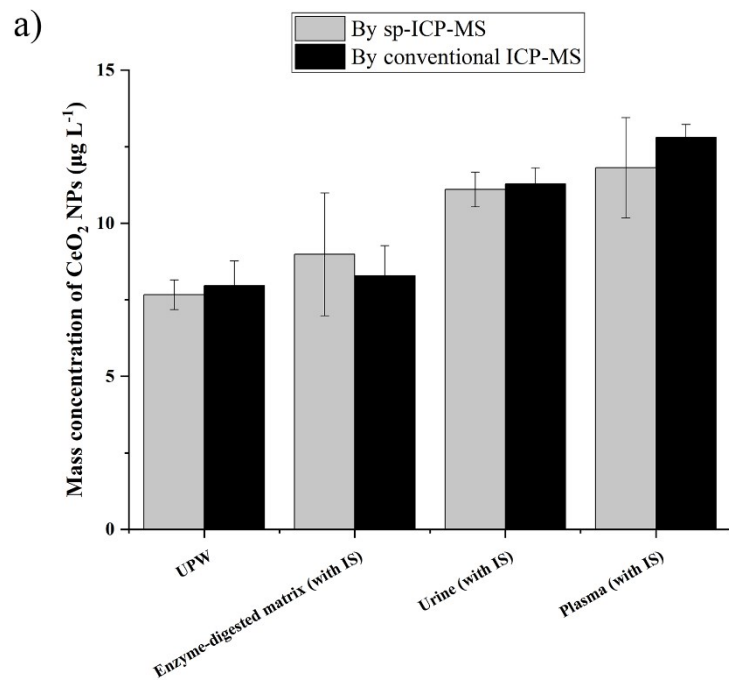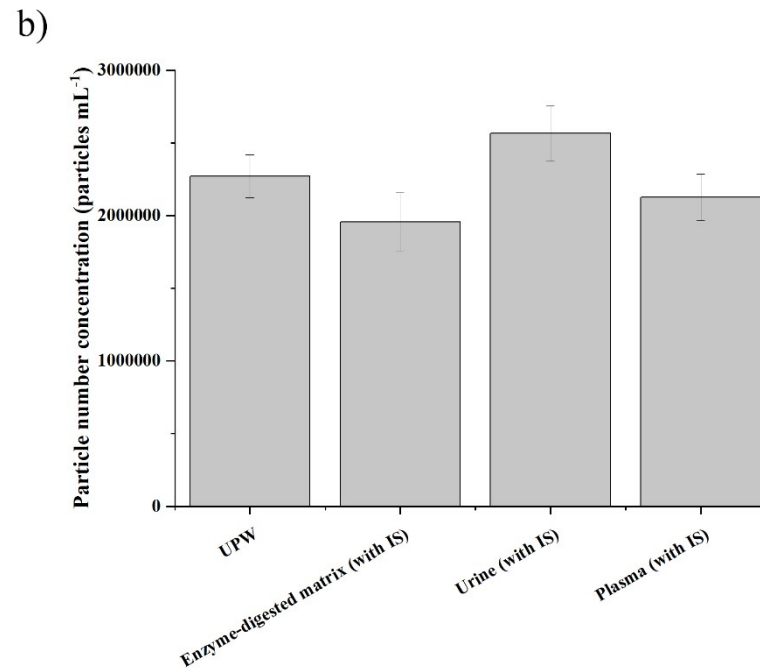

**Fig. S3.** Information of CeO<sub>2</sub> NPs determined by sp-ICP-MS after the IS correction at a dilution factor of 500: a) comparison on mass concentration determined by sp-ICP-MS and conventional ICP-MS (paired t-test,  $p < 0.05$ ); b) particle number concentration of CeO<sub>2</sub> NPs.

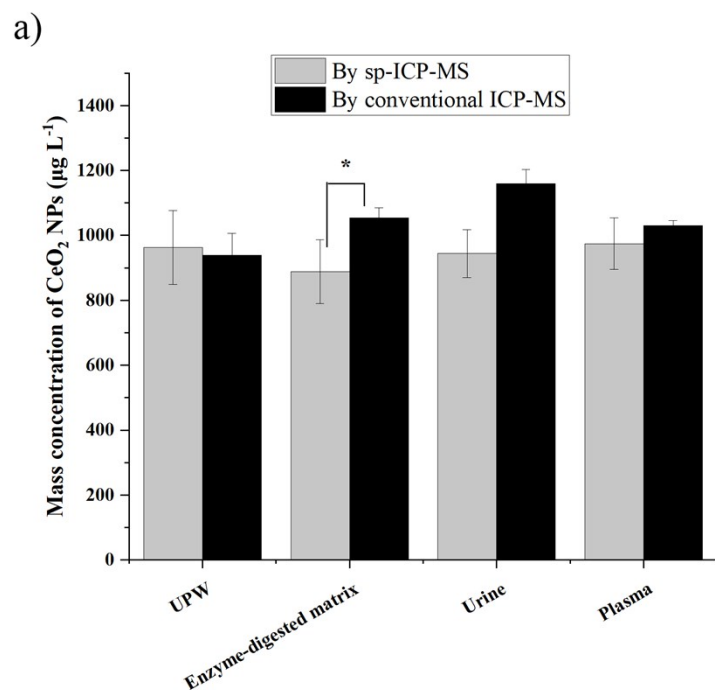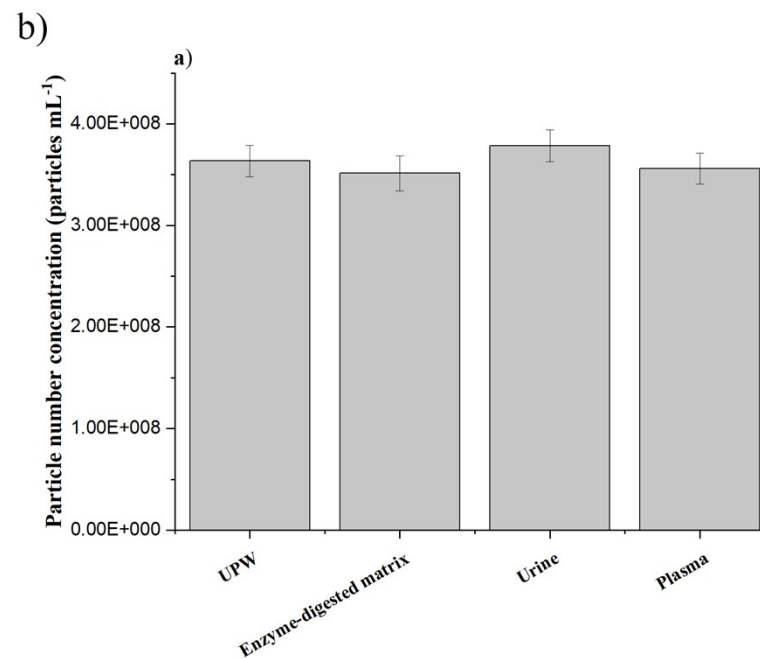

**Fig.S4.** Information of CeO<sub>2</sub> NPs determined by sp-ICP-MS without the IS correction at a dilution factor of 25,000: a) a comparison on mass concentration determined by sp-ICP-MS and conventional ICP-MS. \* Indicates a significant difference between the two methods through a paired t-test ( $p < 0.05$ ); b) particle number concentration of CeO<sub>2</sub> NPs.

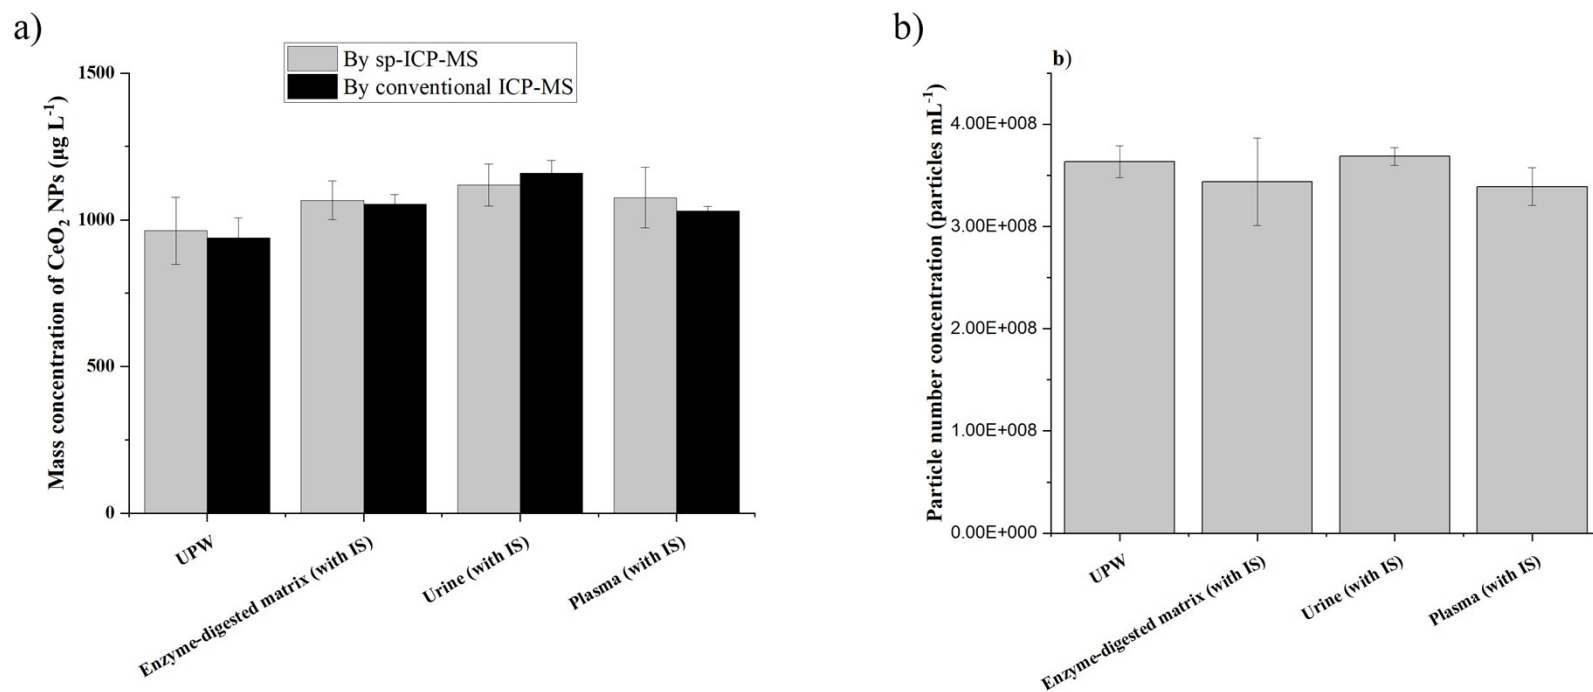

**Fig. S5.** Information of CeO<sub>2</sub> NPs determined by sp-ICP-MS with the IS correction at a dilution factor of 25,000: a) a comparison on mass concentration determined by sp-ICP-MS and conventional ICP-MS (paired t-test,  $p < 0.05$ ); b) particle number concentration of CeO<sub>2</sub> NPs.
